# Supplementary material
Source: publisher site journal article supplement (https://www.dovepress.com/get_supplementary_file.php?f=443240.docx)
Supplement: Supplementary file 1 [file get_supplementary_file.php]

***Supplementary Material***

# Supplementary Figures


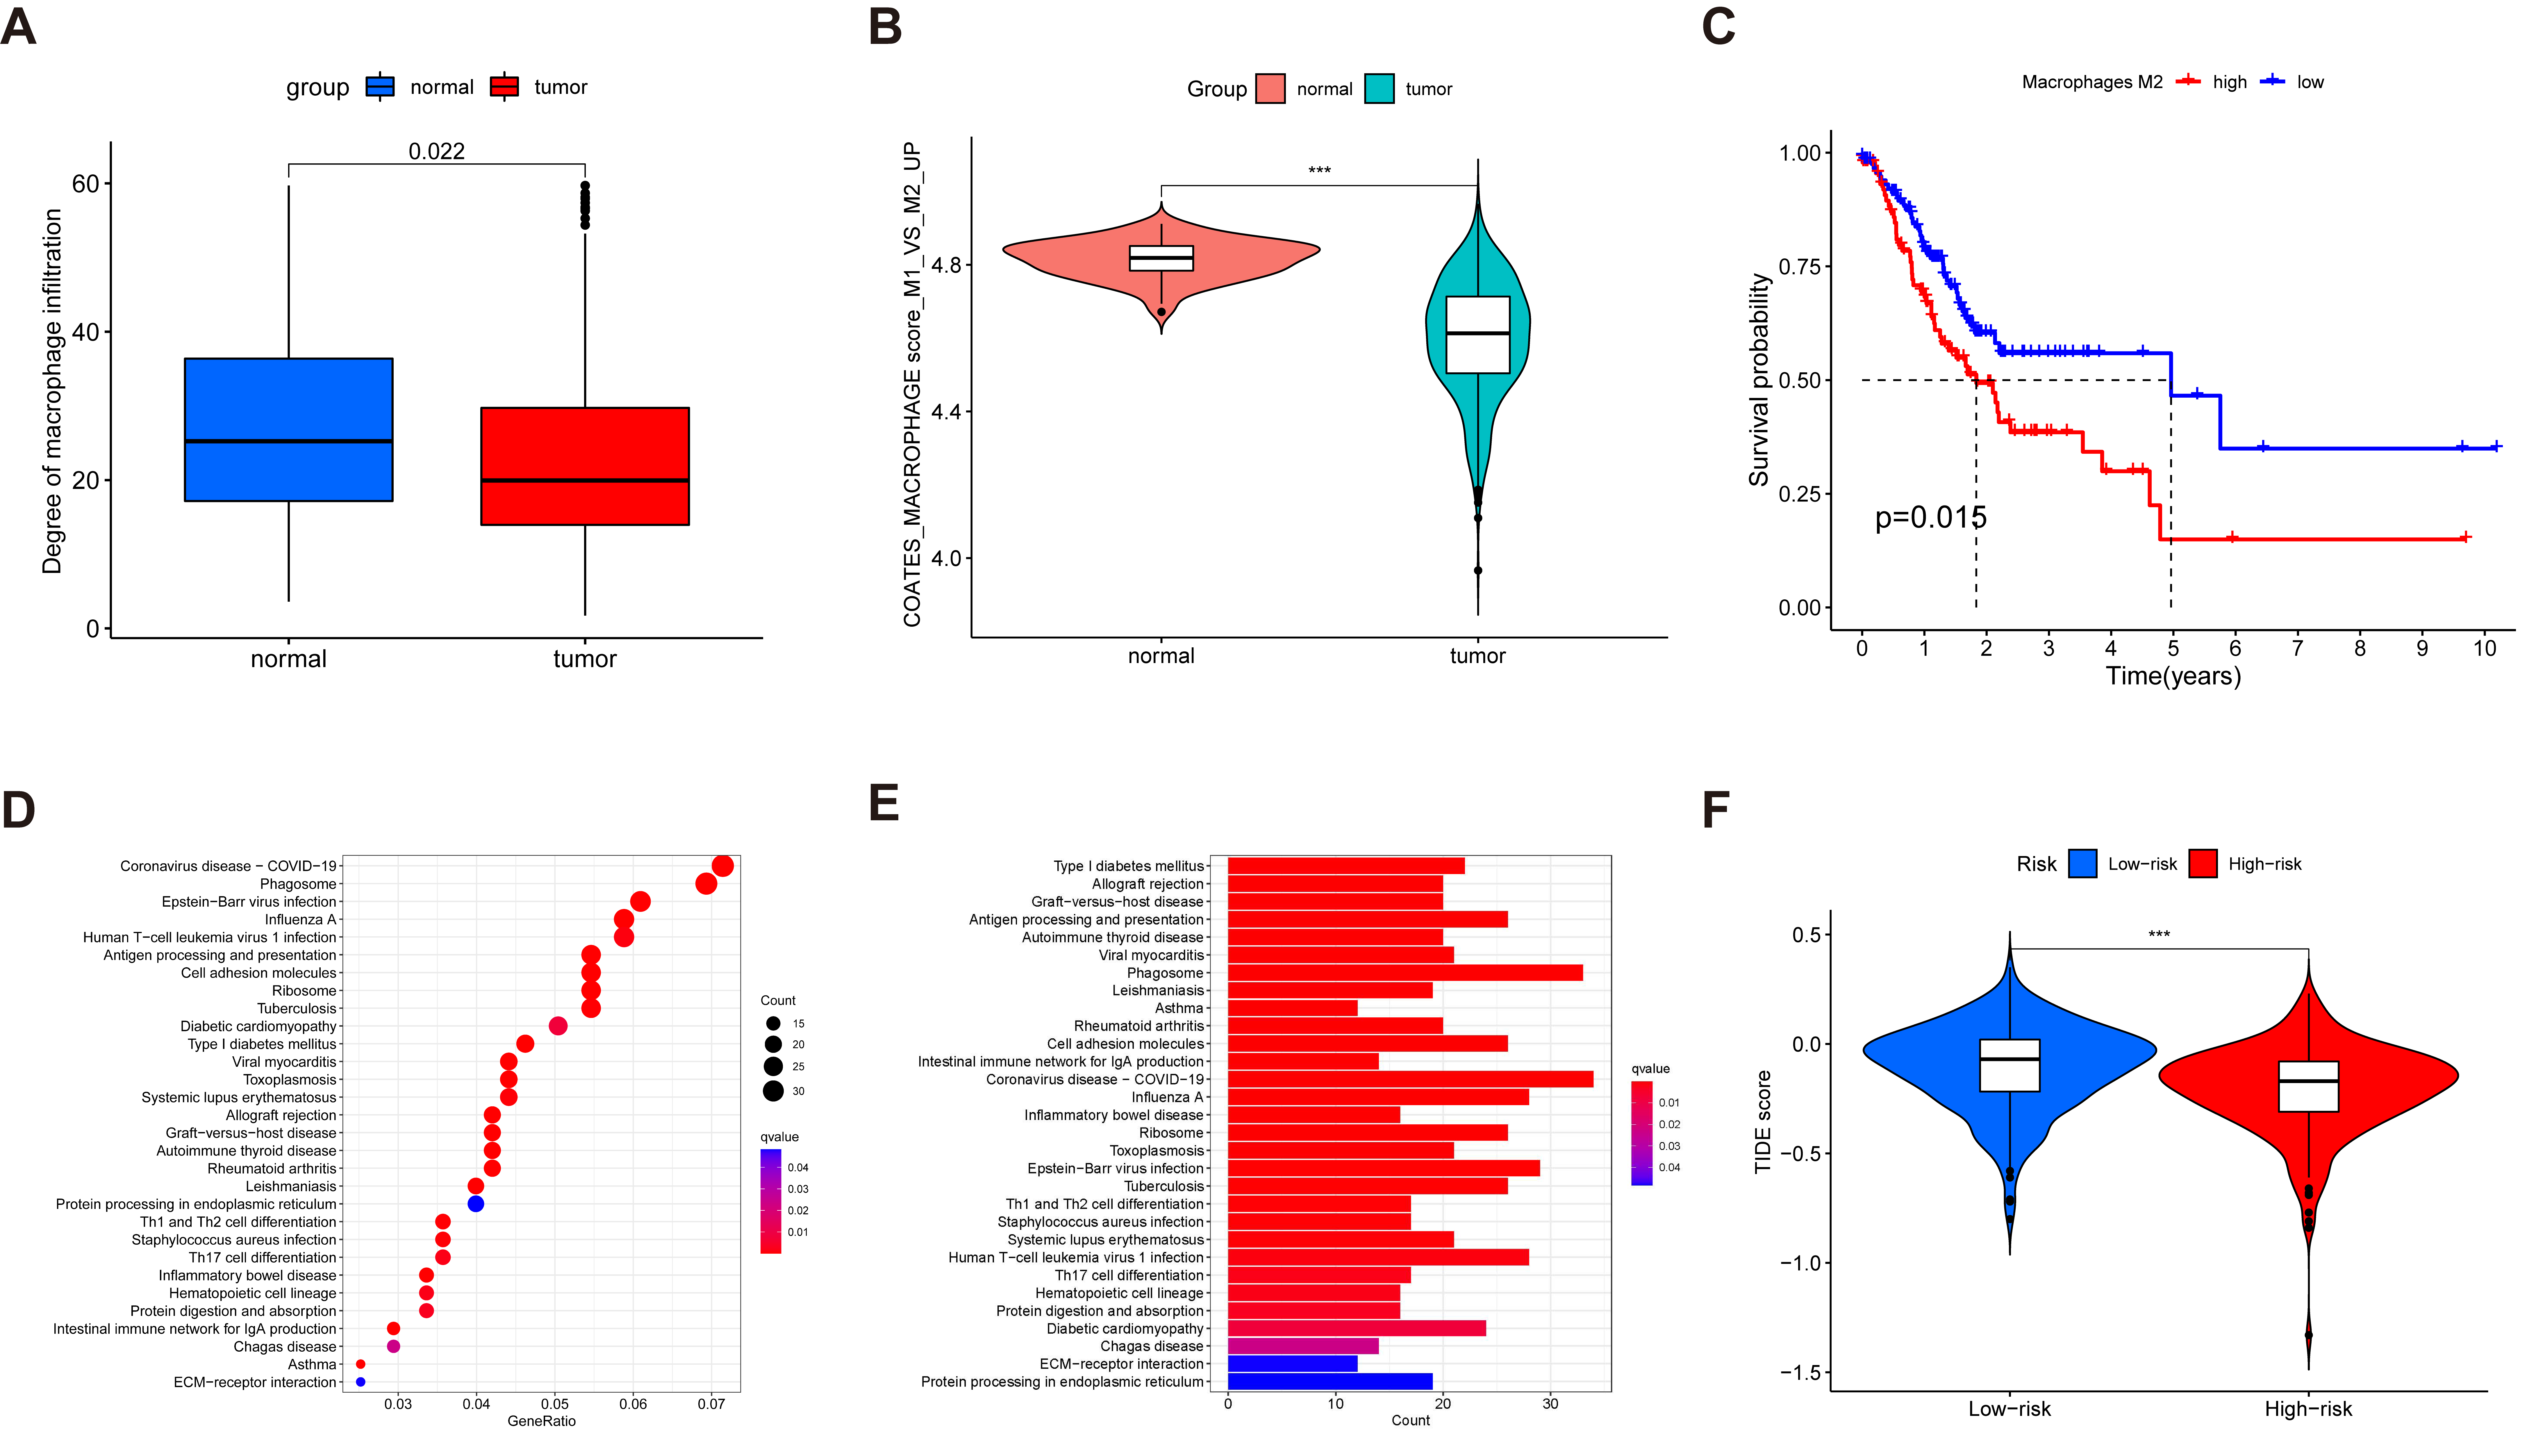


**Figure S1** Analyses of tumor-associated macrophage. (A) Differential infiltration degree of M0, M1 and M2 macrophage between normal and tumor samples in TCGA cohort. (B) Score of COATES_MACROPHAGE_M1_VS_M2 genesets between normal and tumor samples in TCGA cohort. (C) Kaplan-Meier analysis of M2 macrophage infiltration. (D) The bubble diagram of the KEGG pathways enriched for 1027 DEGs between two macrophage subtypes. (E) The bar plot of the KEGG pathways enriched for 1027 DEGs between two macrophage subtypes. (F) TIDE score in two risk groups. TCGA, the cancer genome atlas database; KEGG, Kyoto encyclopedia of genes and genomes; TIDE, Tumor Immune Dysfunction and Exclusion; GO, gene ontology; DEG, differentially expressed genes. *P < 0.05; **P < 0.01; ***P < 0.001.


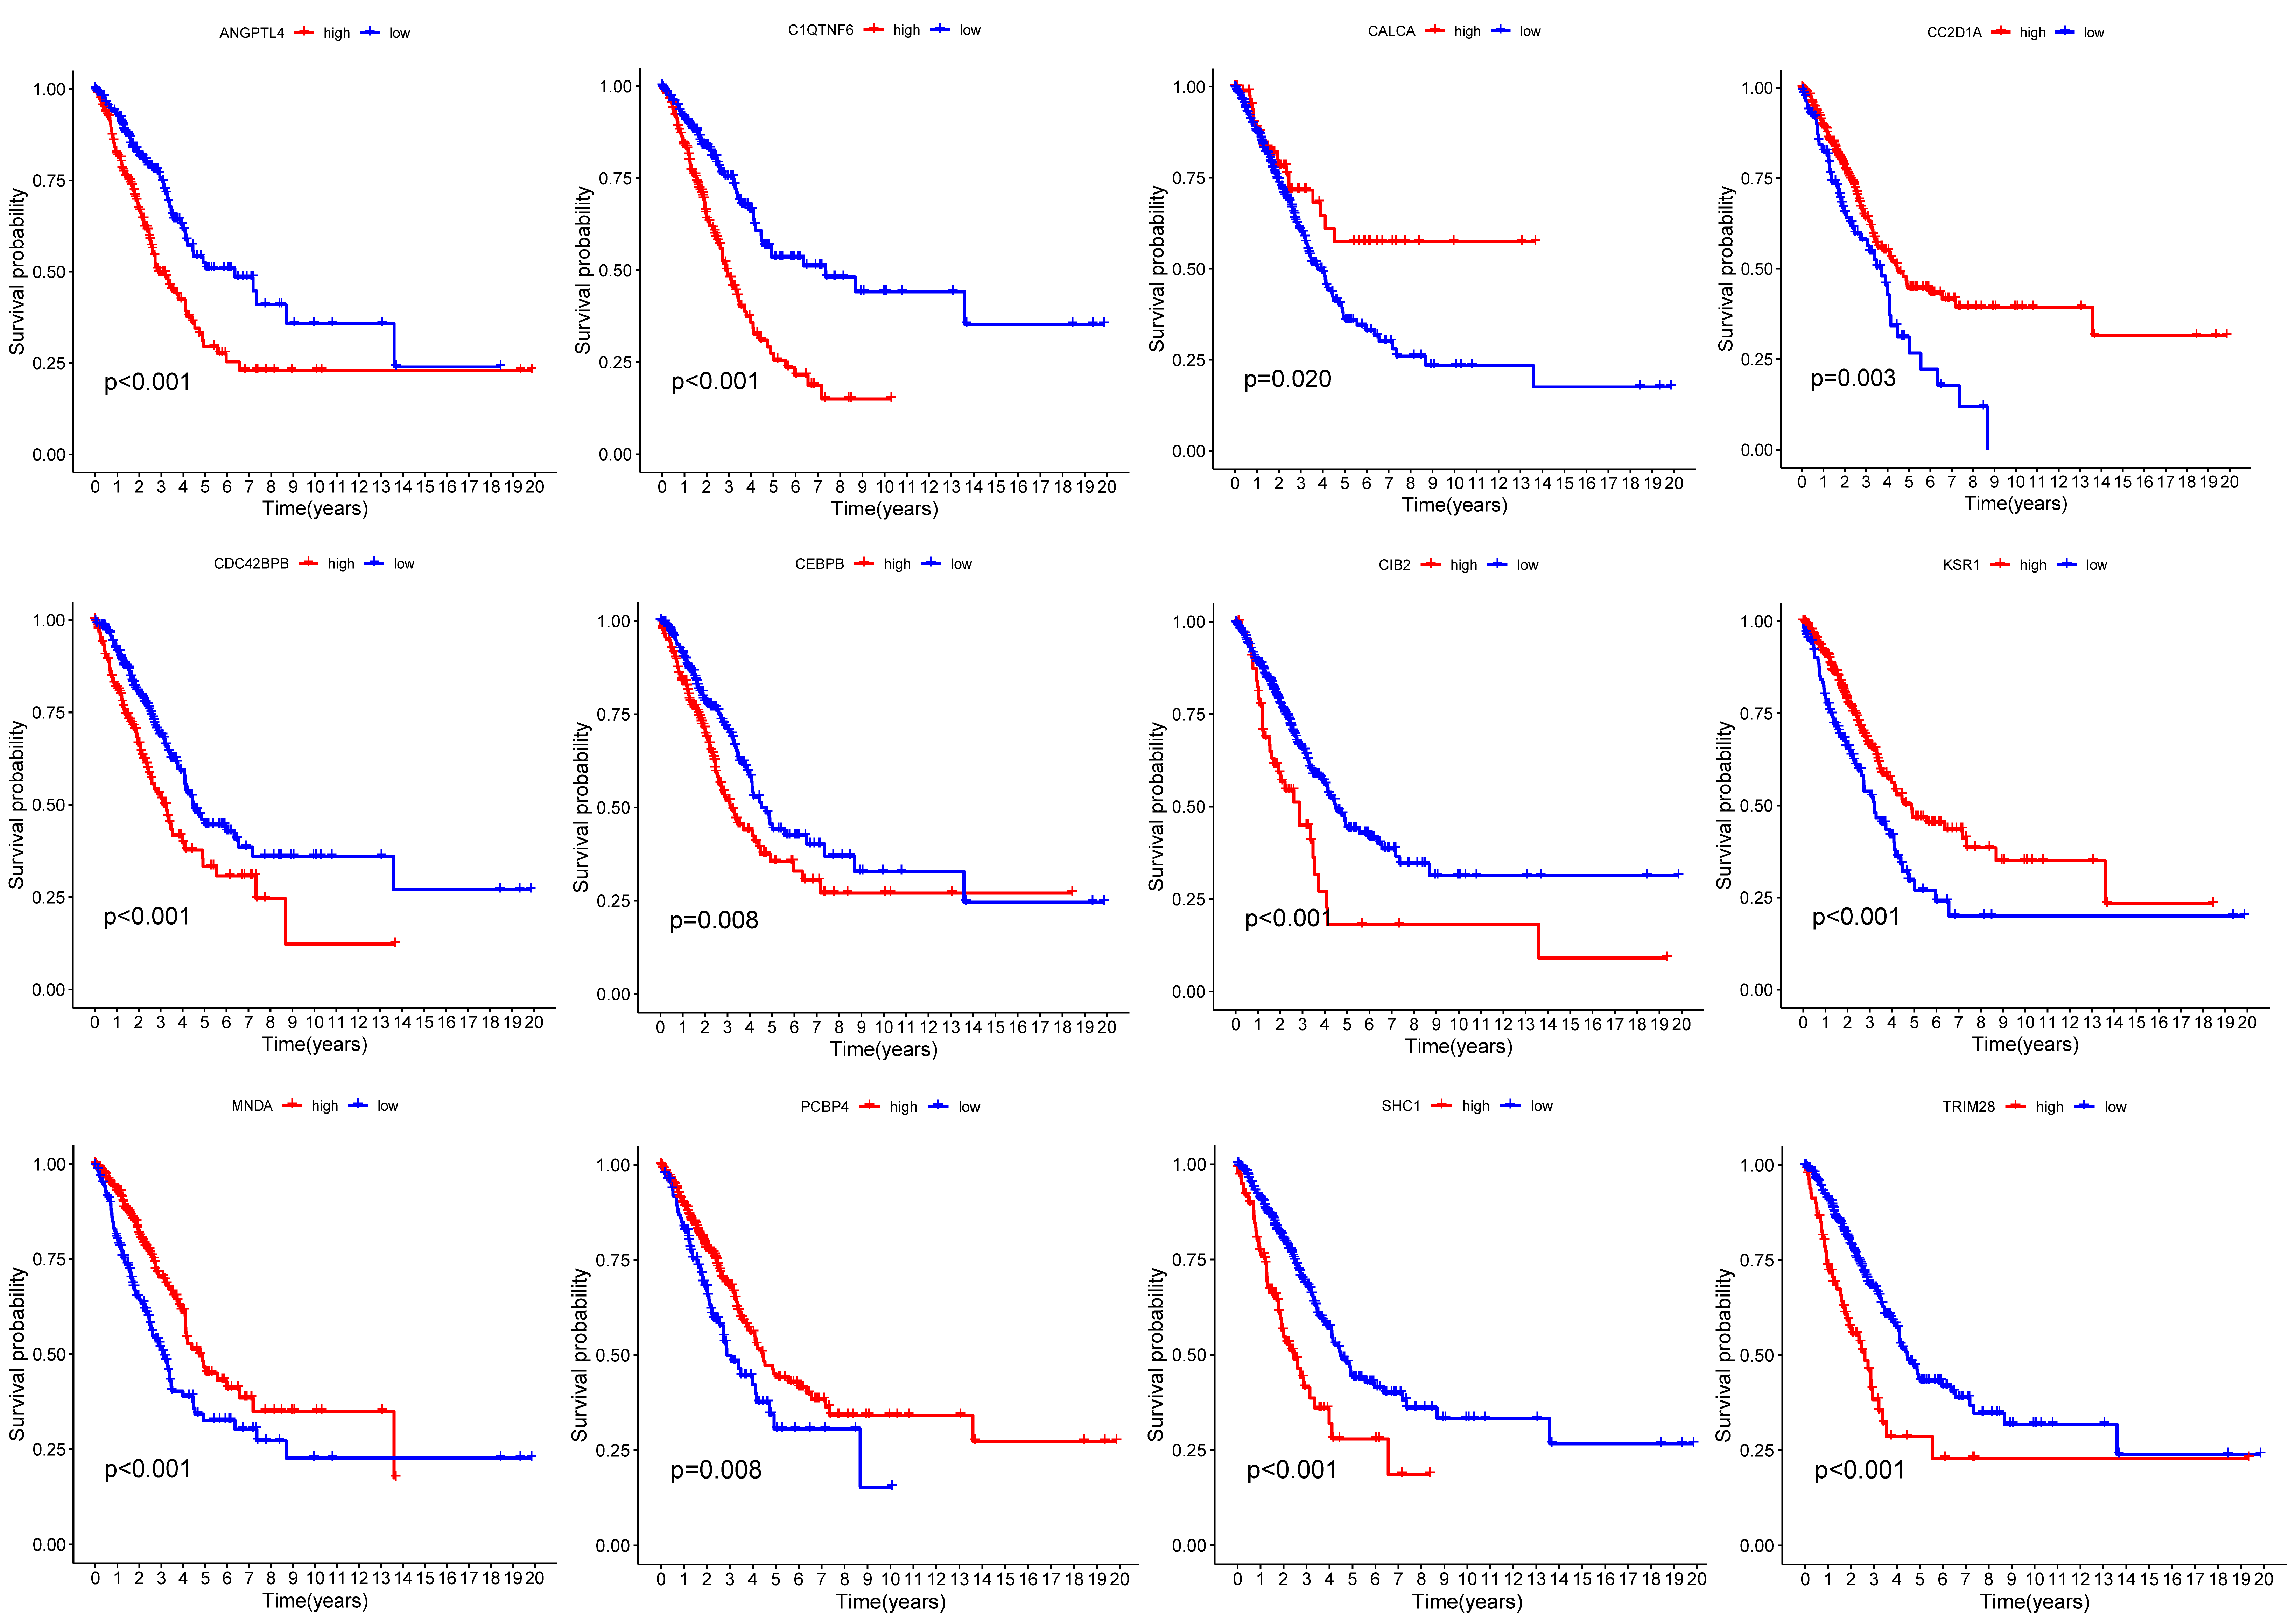


**Figure S2** Kaplan-Meier survival analysis of twelve prognosis-related genes which constructed LMS model. LMS, LUAD macrophage-related signature.


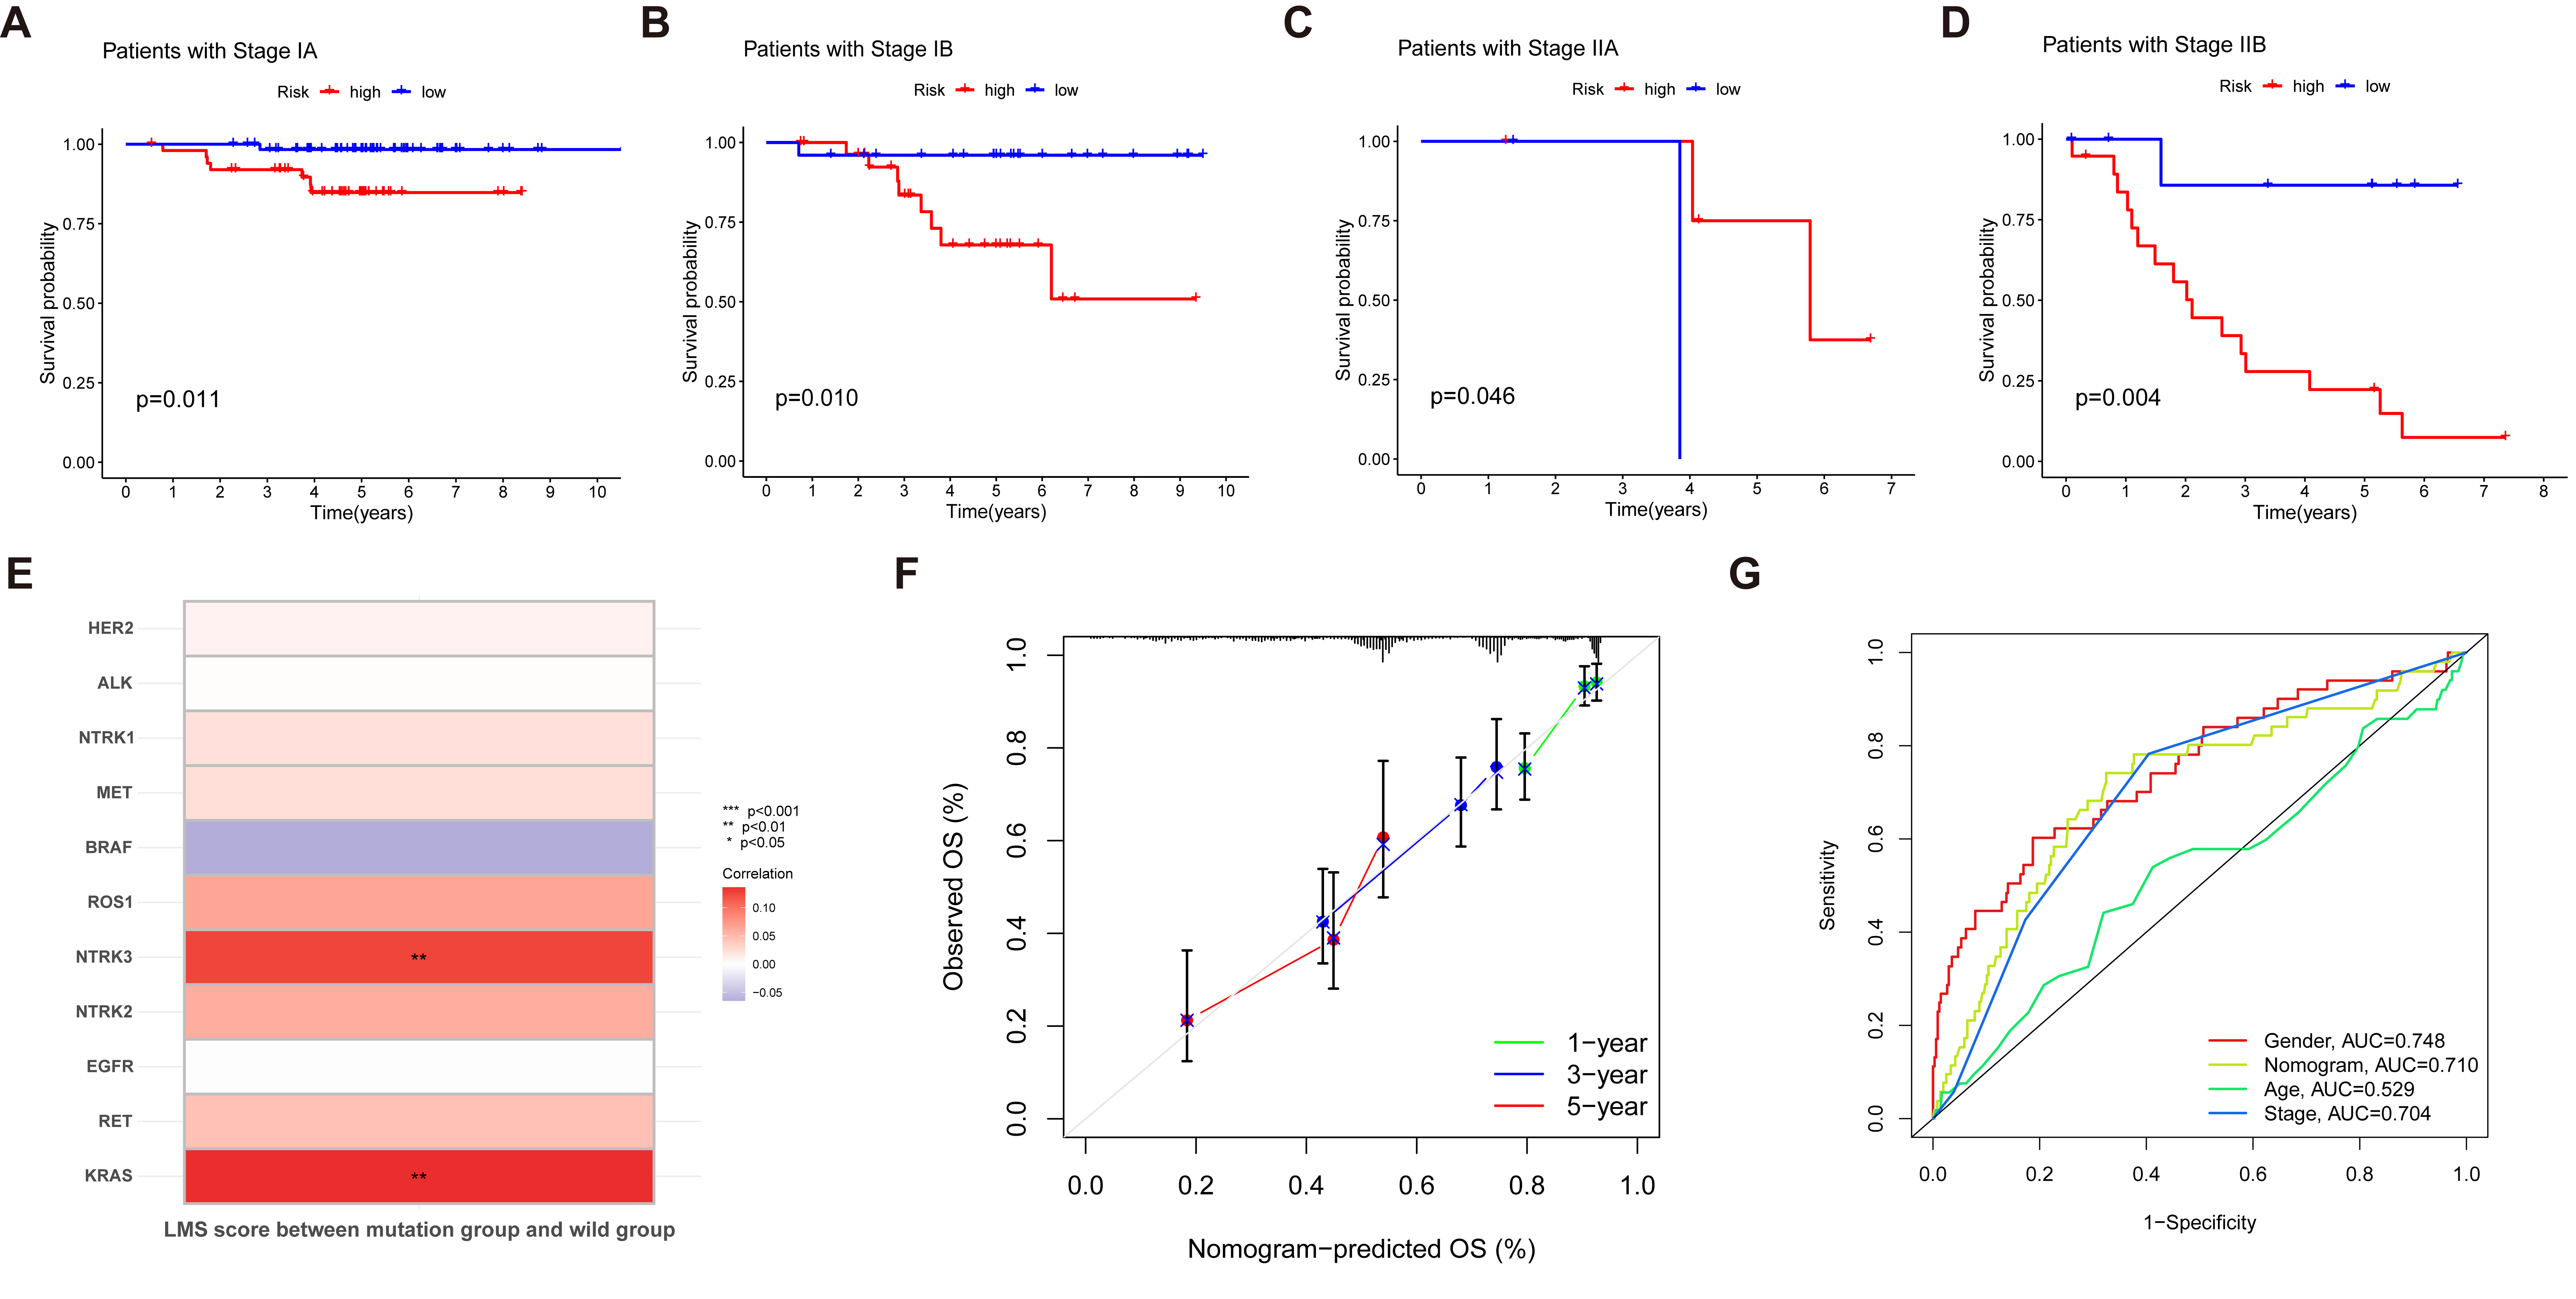


**Figure S3** (A-B) Kaplan-Meier survival analysis between high and low-risk group in different clinical subgroups of GSE31210 cohort. (C-D) Kaplan-Meier survival analysis between high and low-risk group in different clinical subgroups of GSE50081 cohort. (E) Differences in LMS between gene mutation group and wild-type group. (F) Calibration curves of the nomogram without LMS for 1-, 3-, and 5-year overall survival. (G) ROC analysis for OS prediction of nomogram without LMS score. LMS, LUAD macrophage-related signature; ROC, receiver operating characteristic. *p < 0.05, **p < 0.01, ***p < 0.001.


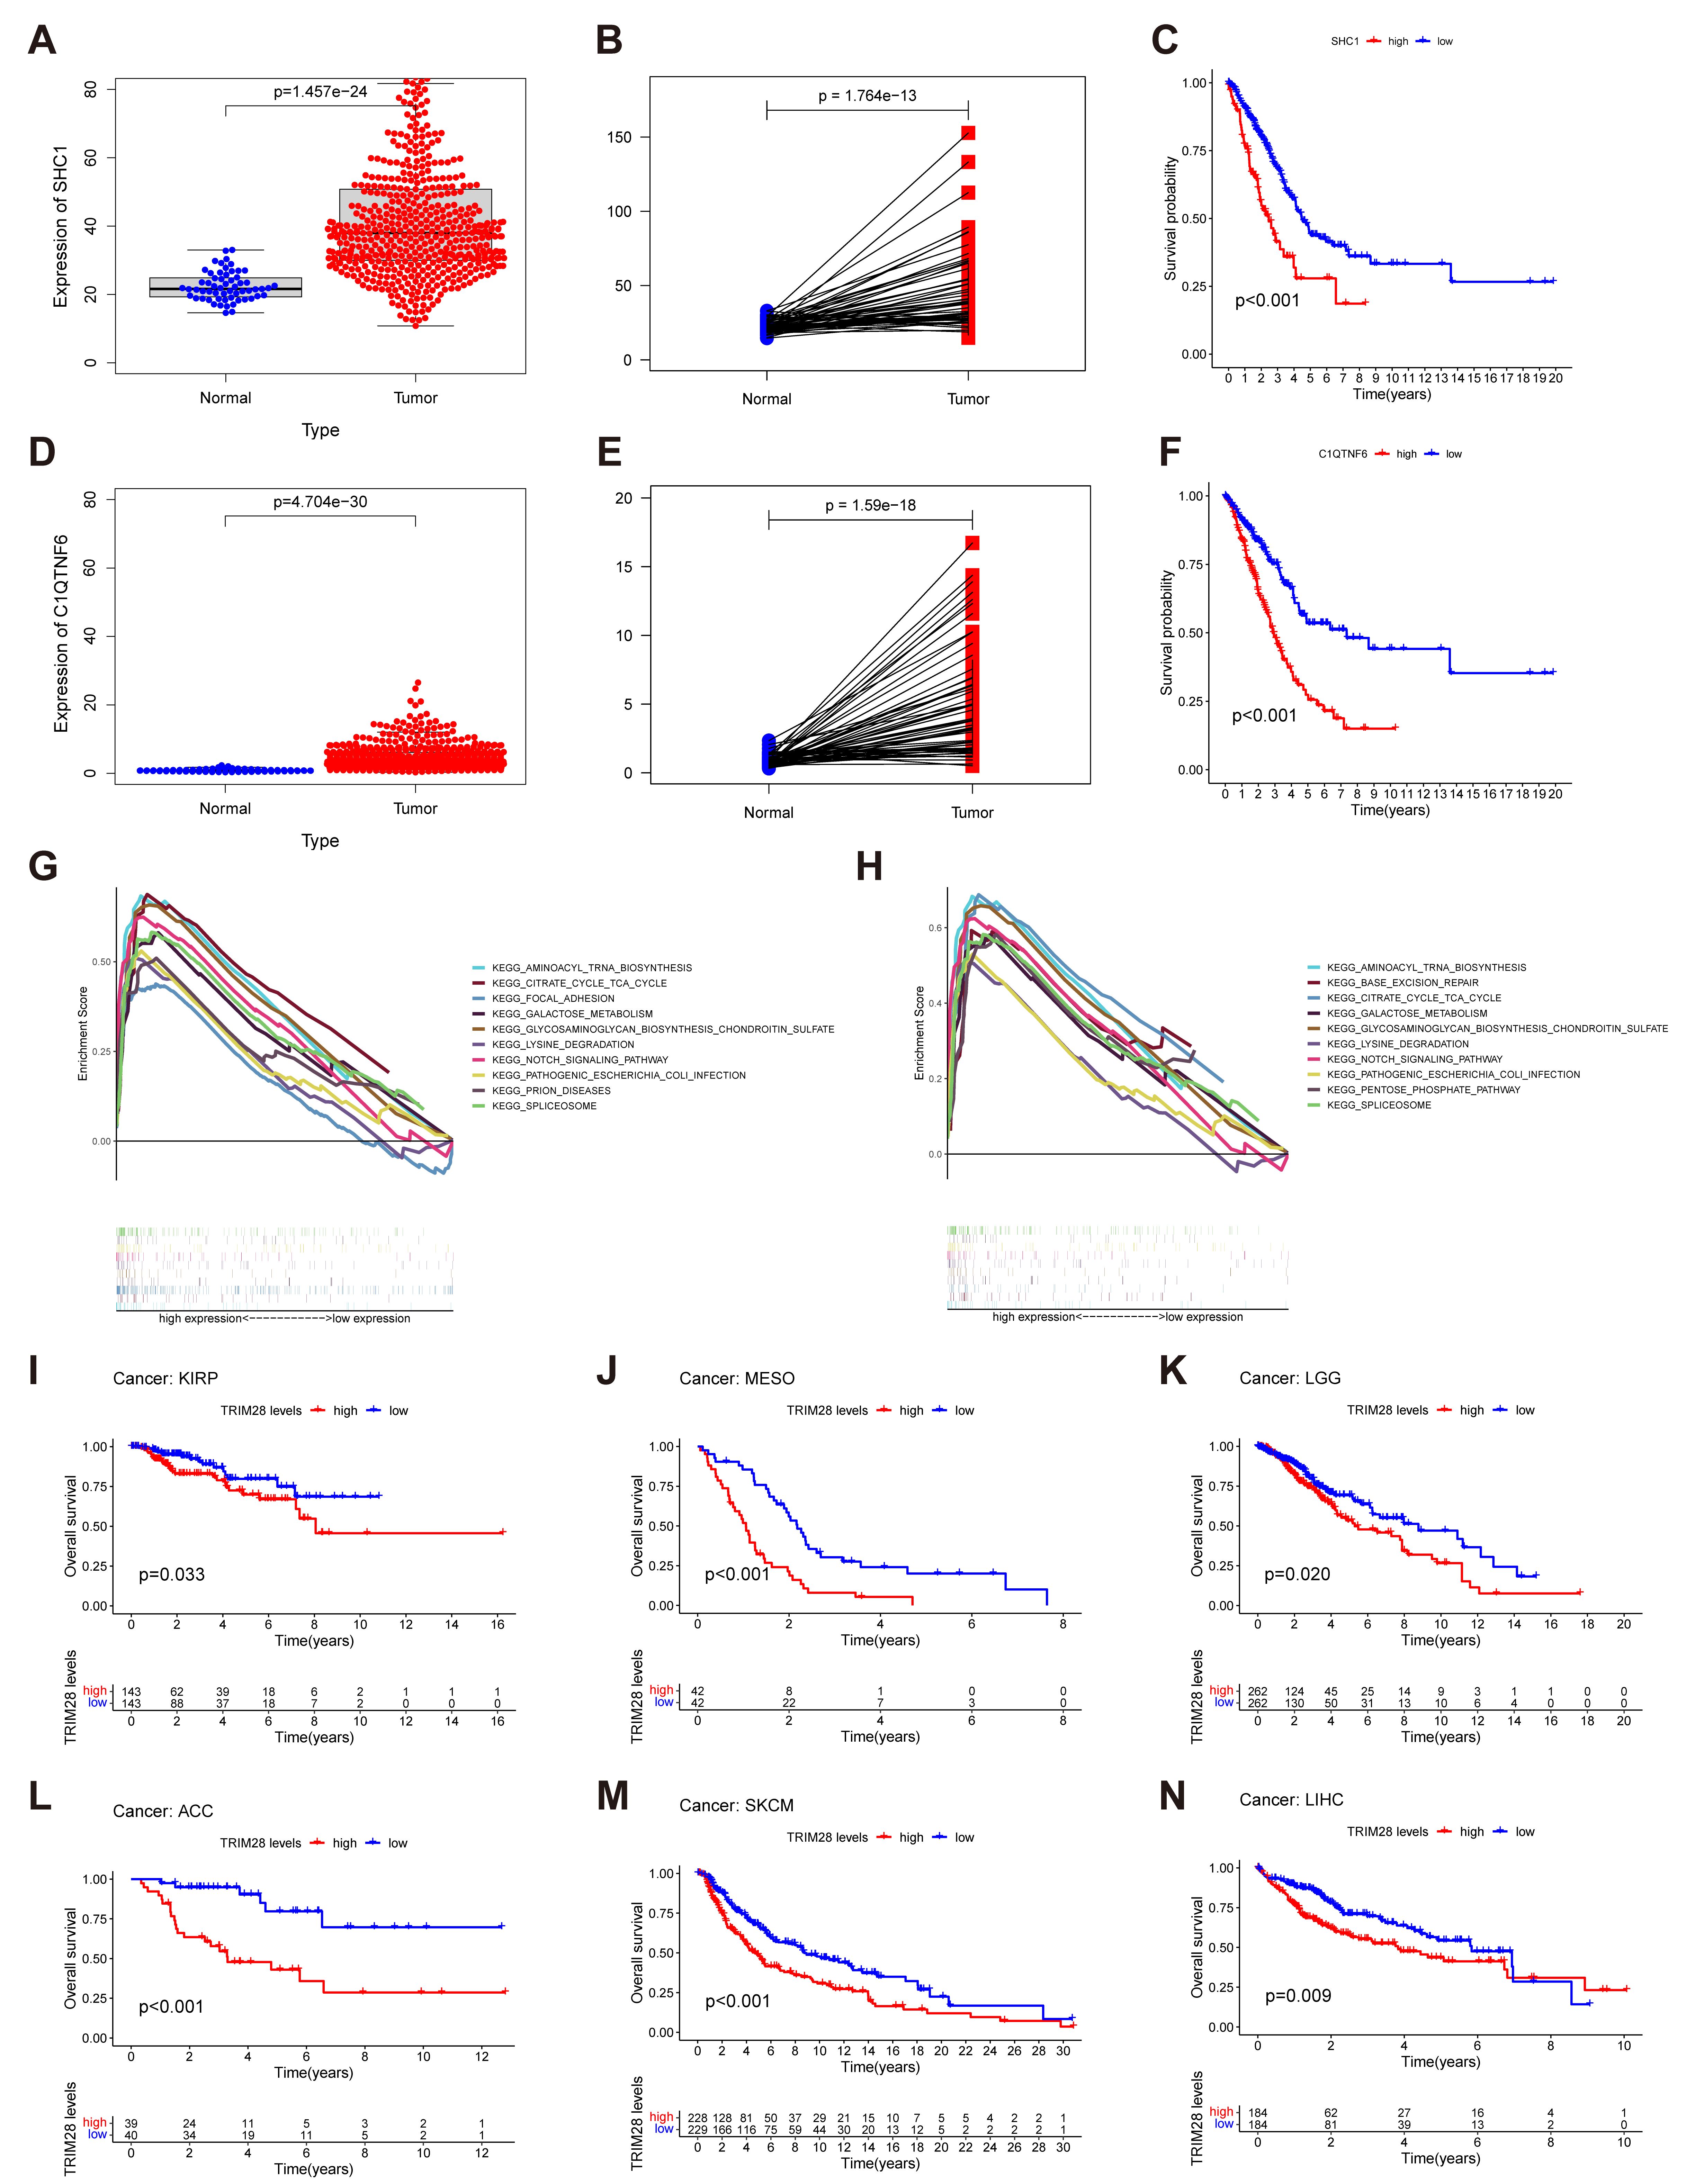


**Figure S4** (A) Expression of SHC1 in normal and tumor tissues of TCGA LUAD cohorts. (B) Paired difference analysis of SHC1 in normal and tumor tissues of TCGA LUAD cohorts. (C) Kaplan-Meier survival analysis between low and high SHC1 groups in LUAD cohorts. (D) Expression of C1QTNF6 in normal and tumor tissues of TCGA LUAD cohorts. (E) Paired difference analysis of C1QTNF6 in normal and tumor tissues of TCGA LUAD cohorts. (F) Kaplan-Meier survival analysis between low and high C1QTNF6 groups in LUAD cohorts.

(G) KEGG pathway enrichment of GSEA analysis between low and high SHC1 groups in TCGA LUAD cohorts. (H) KEGG pathway enrichment of GSEA analysis between low and high C1QTNF6 groups in TCGA LUAD cohorts. (I-N) Kaplan-Meier survival analysis between low and high TRIM28 groups in TCGA cohorts of many types of cancers. TCGA, the cancer genome atlas database; KEGG, Kyoto encyclopedia of genes and genomes; GSEA, gene set enrichment analysis.


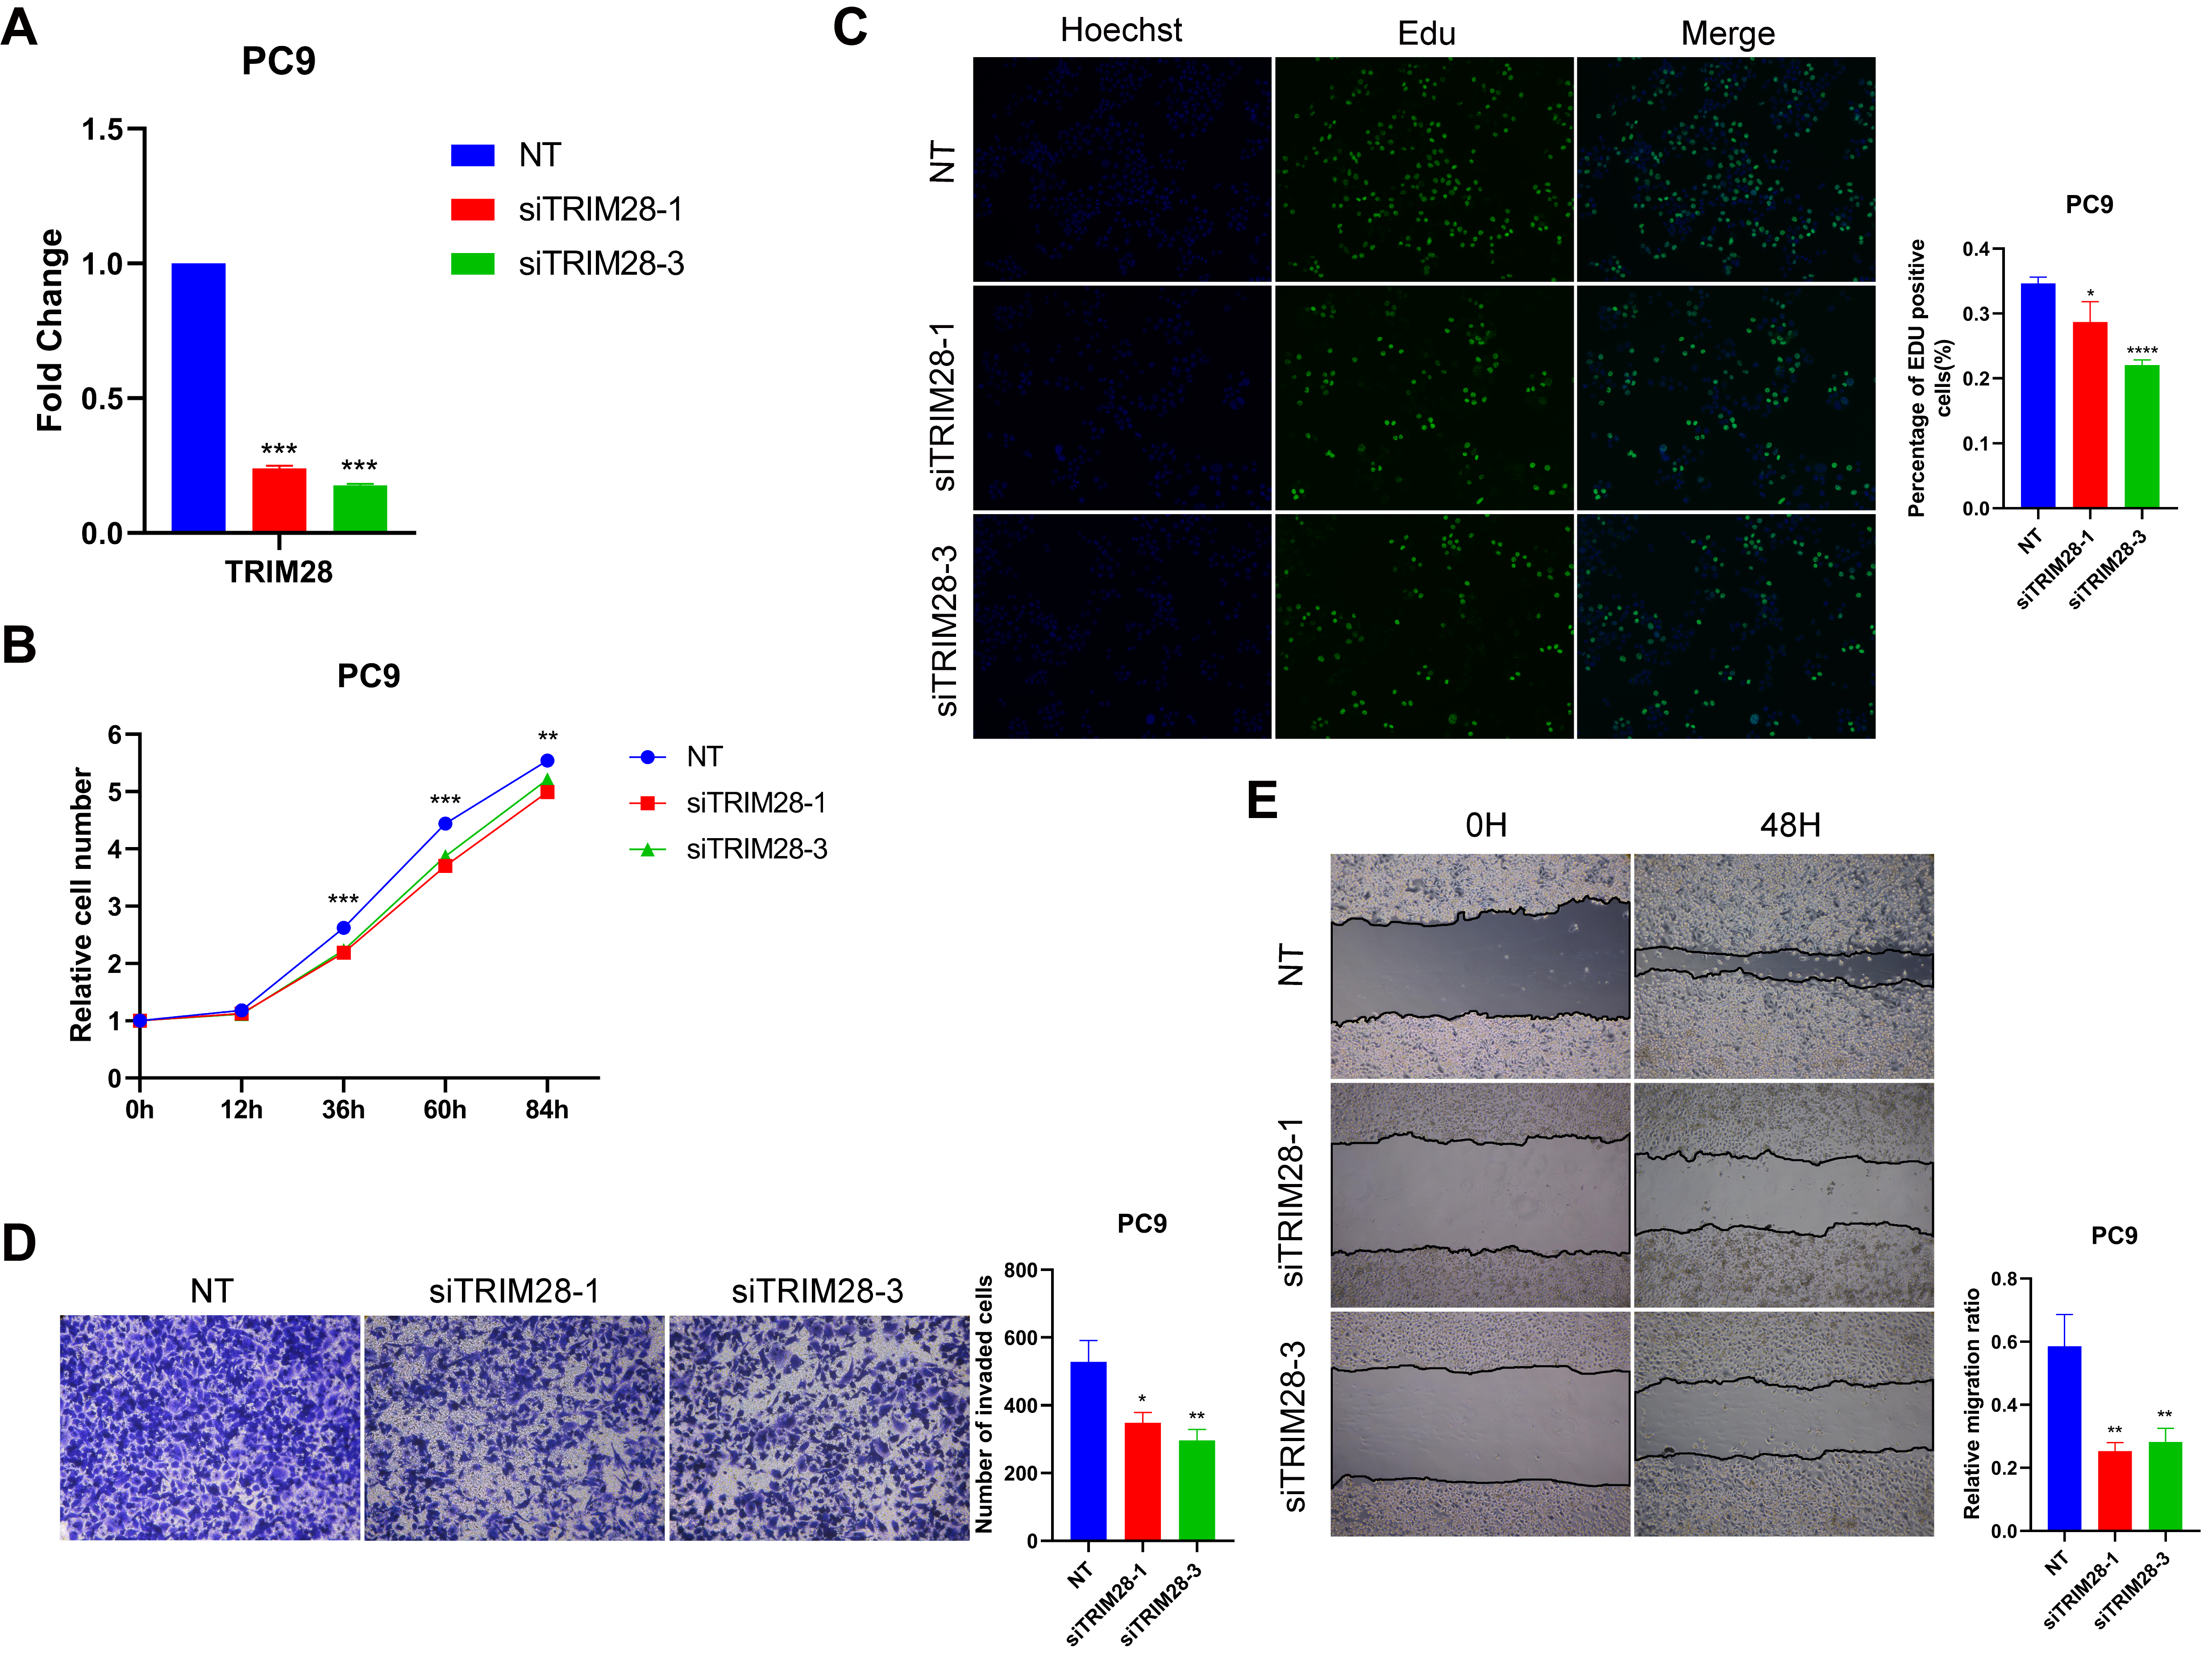


**Figure S5** (A) QRT-PCR was performed to detect the efficiency of TRIM28-siRNA transfection in PC9 cells. (B) SRB assay showed growth curves of PC9 cells treated with TRIM28. (C) EDU assay was used to detect the effect of TRIM28 downregulation on proliferation in PC9 cell lines. (D) The invasion of PC9 cells with treatment of TRIM28 knockdown was detected by transwell assay. (E) Wound healing assay was used to detect cell migration of TRIM28 knockdown in PC9 cells. The data were expressed as means ± standard deviation (SD). QRT-PCR, real-time quantitative PCR; SRB, Sulforhodamine B; EDU, 5-ethynyl-2-deoxyuridine; *p < 0.05, **p < 0.01, ***p < 0.001, ****p < 0.0001.

# Supplementary Tables

**Table S1** Primers used in this study

| **Genes** | **primer-F (5'-3')** | **primer-R (5'-3')** |  |
| --- | --- | --- | --- |
| 18S | CAGCCACCCGAGATTGAGCA | TAGTAGCGACGGGCGGTGTG |  |
| TRIM28 | CACAAGGACCACCAGTACCAG | CATCCACTTGCACACGCTTC |  |
| PD-L1 | GCTATGGTGGTGCCGACTACAA | GGTGGTGGTCTTACCACTCAGGA |  |

**Table S2** Coefficient of 12 genes in the formula of LMS model

| **Genes** | **Coefficient** |
| --- | --- |
| KSR1 | -0.1327 |
| MNDA | -0.0233 |
| CDC42BPB | 0.0284 |
| CC2D1A | -0.0434 |
| ANGPTL4 | 0.0058 |
| PCBP4 | -0.0483 |
| CALCA | 0.0003 |
| C1QTNF6 | 0.0464 |
| SHC1 | 0.0055 |
| CEBPB | 0.0064 |
| CIB2 | 0.0511 |
| TRIM28 | 0.0057 |
